# Supplementary material
Source: HighWire-hosted journal article supplement (https://bjsm.bmj.com/content/suppl/2015/10/14/49.7.421)
Supplement: RED-S_CAT_NOR_PROOF_20151002.pdf [file RED-S_CAT_NOR_PROOF_20151002.pdf]

# RED-S CAT™

## Relativ energimangel i idrett (RED-S) Klinisk måleinstrument (CAT)

Benyttes av helsepersonell

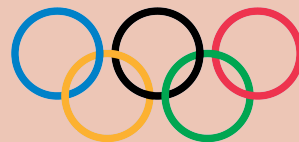

Navn:

Dato:

Undersøker:

### Hva er RED-S CAT?

En ekspertgruppe oppnevnt av IOC Medical Commission har publisert et klinisk instrument som kan benyttes i forbindelse med undersøkelse og diagnostisering av idrettsutøvere ved mistanke om relativ energimangel, og som et hjelpemiddel i forbindelse med det å ta stilling til om en utøver som har vært til oppfølging/behandling for syndromet er klar for å gjenoppta trening og konkurranse.

På engelsk omtales dette instrumentet som RED-S CAT (Relative Energy Deficiency in Sport Clinical Assessment Tool). Forkortelsen RED-S CAT vil bli benyttet i den videre tekst. RED-S CAT kan anvendes av personer med helsefaglig kompetanse, for en klinisk vurdering av utøvere med symptomer på syndromet lav energitilgjengelighet. RED-S CAT instrumentet er basert på Den Internasjonale Olympiske Komites (IOC) consensus artikkel (RED-S, 2014 <sup>1</sup>).

Dette instrumentet kan kopieres i sin nåværende form til bruk av idrettsorganisasjoner og idrettsmedisinske team. Endringer av instrumentet eller reproduksjon for publikasjonsformål krever tillatelse fra IOC.

**NB:** RED-S er en medisinsk diagnose. Diagnostisering foretas av helsepersonell. Beslutning knyttet til spørsmålet om når utøver med RED-S syndromet kan returnere til trening og konkurranse utføres i samråd med erfarne idrettsmedisinske team.

### Hva er relativ energimangel i idrett?

Syndromet RED-S refererer til nedsatt fysiologisk funksjon forårsaket av relativ energimangel, og påvirker blant annet energiomsetningen, menstruasjonssyklusen, beinmineraltetthet, immunforsvaret, proteinsyntesen, og kardiovaskulær helse.

Årsaken til RED-S er lav energi tilgjengelighet, der et individs totale energiinntak via kosten ikke er tilstrekkelig til å dekke det resterende energi behov som kreves for helse, daglige gjøremål/hverdagsaktivitet, når energikostnadene ved trening også er tatt i betraktning.

Potensielle helsekonsekvenser knyttet til RED-S er presentert i figur 1. Når det gjelder psykologiske problemer kan det både være en årsak til og en konsekvens av RED-S.

Som det fremgår av figur 2 kan RED-S også påvirke ulike prestasjonsvariabler:

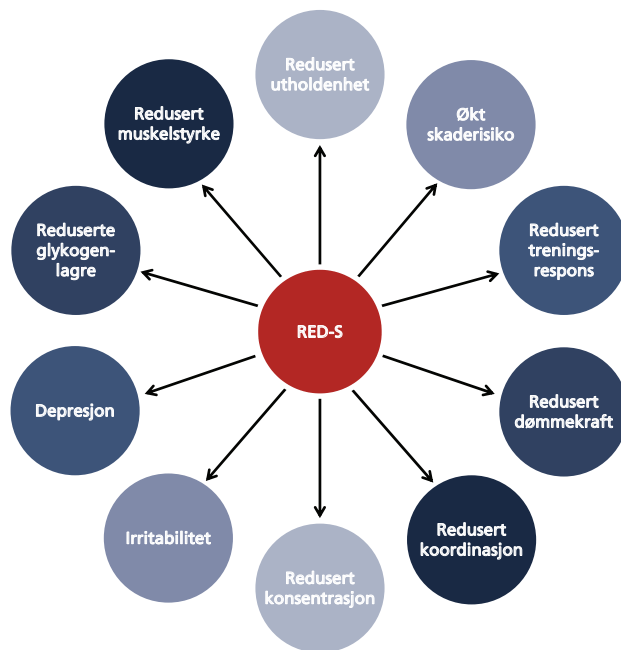

Figur 2

### Screening av RED-S

Screening og diagnostisering av RED-S kan være utfordrende i og med at symptomene kan være skjulte. RED-S kan forekomme i alle sær idretter, men det er en overhyppighet i idretter hvor bedømming av prestasjon inkluderer vektlegging av estetikk eller utseende, idretter med vekt kategorier, samt utholdenhetsidretter. Det bør være en spesiell fokus på de utøverne som er i risikozonen eller utøvere som representerer de kjente risikomiljøene (utholdenhetskrevende-, estetiske- og vekt klasse idretter). Tidlig diagnostisering er viktig for å redusere risiko for langvarige helseplager og for å opprettholde og videreutvikle prestasjon.

Screening av RED-S kan foretas som en del av en årlig, helseundersøkelse og/ når en idrettsutøver kommer til en konsultasjon og registreres med forstyrret spiseatferd (FS) / spiseforstyrrelse (SF), vekttap, mangel på normal vekst og utvikling, endokrin dysfunksjon, tilbakevendende skader og sykdom, nedsatt/variasjon i prestasjonsevne eller humørsvingninger.

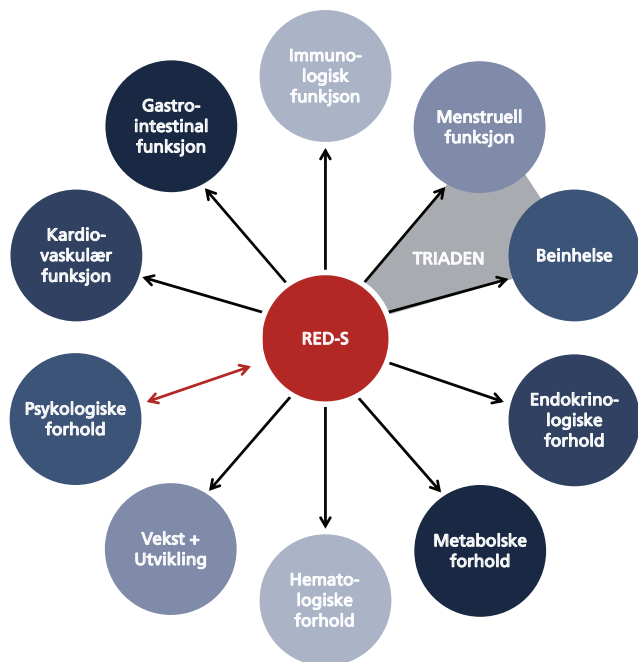

Figur 1

## RED-S Modell for risikovurdering for deltagelse i idrett

Denne screeningundersøkelsen kan gjennomføres som en del av den ordinære helsesjekken som utøvere har. Avhengig av hvilke symptomer som registreres i forbindelse med undersøkelsen, kan utøveren via denne risikovurderingen klassifiseres i en av de tre følgende kategorier: **«Rødt lys»:** Høy risiko, **«Gult lys»:** Moderat risiko, **«Grønt lys»:** Lav risiko.

| HØY RISIKO:<br>START NEKT<br>RØDT LYS                                                                                                                                                                                                                                                                                                                                               | MODERAT RISIKO:<br>VÆR OPPMERKSOM<br>GULT LYS                                                                                                                                                                                                                                           | LAV RISIKO:<br>GRØNT LYS                                                                                                                                                       |
|-------------------------------------------------------------------------------------------------------------------------------------------------------------------------------------------------------------------------------------------------------------------------------------------------------------------------------------------------------------------------------------|-----------------------------------------------------------------------------------------------------------------------------------------------------------------------------------------------------------------------------------------------------------------------------------------|--------------------------------------------------------------------------------------------------------------------------------------------------------------------------------|
| <ul style="list-style-type: none"> <li>- Anorexia nervosa og andre alvorlige spiseforstyrrelser</li> <li>- Andre alvorlige medisinske (fysiologiske og psykologiske) tilstander relatert til lav energitilgjengelighet</li> <li>- Bruk av ekstreme vektreguleringsteknikker som fører til dehydreringsindusert hemodynamisk ustabilitet, og andre livstruende tilstander</li> </ul> | <ul style="list-style-type: none"> <li>- Vedvarende unormal lav fett % målt med DXA* eller ved antropometri</li> <li>- Betydelig vektapp (5-10% av kroppsvekt på en måned)</li> <li>- Stagnasjon i forventet fysisk vekst og utvikling hos unge utøvere</li> </ul>                      | <ul style="list-style-type: none"> <li>- Tilfredsstillende fysikk som opprettholdes uten bruk av helseskadelig spise-/treningstrategier</li> </ul>                             |
|                                                                                                                                                                                                                                                                                                                                                                                     | <ul style="list-style-type: none"> <li>- Lav **energi tilgjengelighet av forlenget og/eller alvorlig natur</li> </ul>                                                                                                                                                                   | <ul style="list-style-type: none"> <li>- Sunne spisevaner med optimal energi tilgjengelighet</li> </ul>                                                                        |
|                                                                                                                                                                                                                                                                                                                                                                                     | <ul style="list-style-type: none"> <li>- Unormal menstruasjonssyklus: funksjonell hypotalamisk amenoré &gt;3 måneder</li> <li>- Ingen menarke ved 15-års alder hos jenter</li> </ul>                                                                                                    | <ul style="list-style-type: none"> <li>- Friskt endokrint system</li> </ul>                                                                                                    |
|                                                                                                                                                                                                                                                                                                                                                                                     | <ul style="list-style-type: none"> <li>- Redusert beinmineraltetthet (enten ved sammenligning med tidligere DXA eller Z-score &lt; -1 SD)</li> <li>- Historie med 1 eller flere brudd assosiert med hormonell/dysfunksjonell menstruasjon og/eller lav energitilgjengelighet</li> </ul> | <ul style="list-style-type: none"> <li>- Beinmineraltetthet som forventet i forhold til type idrett, alder og etnisitet</li> <li>- Friskt muskel- og skjelettsystem</li> </ul> |
| <ul style="list-style-type: none"> <li>- Alvorlige EKG forandringer (f.eks. bradykardi)</li> </ul>                                                                                                                                                                                                                                                                                  | <ul style="list-style-type: none"> <li>- Utøvere med fysiske/psykiske komplikasjoner relatert til lav energitilgjengelighet +/- forstyrret spiseatferd</li> <li>- Tester som viser avvik som kan relateres til lav energitilgjengelighet +/- forstyrret spiseatferd</li> </ul>          |                                                                                                                                                                                |
|                                                                                                                                                                                                                                                                                                                                                                                     | <ul style="list-style-type: none"> <li>- Langvarig relativ energimangel</li> <li>- Forstyrret spiseatferd som påvirker andre med-utøvere</li> <li>- Mangel på progresjon i behandling og/eller ikke etterfølgelse av behandling</li> </ul>                                              |                                                                                                                                                                                |

\* Dual energy X-ray Absorptiometry

\*\*Energitilgjengelighet = Energiinntak – energiforbruk ved trening (et ytterligere energiforbruk ved gjennomføring av treningsøkt).

### MERKNAD knyttet til diagnostisk instrument for lav energitilgjengelighet:

Selv om lav energitilgjengelighet er en nøkkelfaktor i RED-S, er det på det nåværende tidspunkt ingen standardisert protokoll for å måle energitilgjengelighet hos idrettsutøvere. Enkelte som jobber aktivt med idrettsnæring har utviklet egne verktøy for å overvåke energitilgjengelighet som de har tillitt til, og benytter disse ved kartlegging av energitilgjengelighet eller ved kostholdsrådgivning. En universell anbefaling om hvordan en skal måle energitilgjengelighet er ikke gitt i og med at vi per i dag ikke har en protokoll/screeningverktøy som er sensitiv, pålitelig, tids-effektiv og kostnadseffektiv.

### Idrettsdeltakelse basert på risikokategori

**«Høy risiko – Rødt lys»:** ikke klarsignal for deltagelse i idrett.

På grunn av alvorlighetsgraden av hans / hennes kliniske tilstand kan deltagelse i idrett utgjøre en alvorlig fare for hans / hennes helse, og deltagelse vil også kunne ha en uheldig innvirkning på det fokuset som bør rettes mot behandling og restitusjon.

**«Moderat risiko – Gult lys»:** klarering for trenings- og konkurransedeltagelse dersom utøveren veiledes tett og har en medisinsk behandlingsplan.

En risikovurdering av utøveren (re-evaluering) bør skje med jevne mellomrom på 1-3 måneder, avhengig av det kliniske bildet for å vurdere etterlevelse av behandlings/oppfølgingsplan samt å oppdage endringer i klinisk status.

**«Lav risiko – Grønt lys»:** full deltagelse på trening og i konkurranse.

## Behandling av relativ energimangel i idrett (RED-S)

Idrettsutøvere som kommer i kategorien «rødt lys» og «gult lys» bør få en medisinsk vurdering og behandling. Ideelt bør utøvere med RED-S behandles av et team bestående av en lege med spesialitet i idrettsmedisin, en fagperson med idrettsnæring som spesialitet, en treningsfysiolog, idrettsterapeut eller trener og idrettspsykolog/psykiater ved behov. Taushetsplikt må selvfølgelig opprettholdes. I behandlingen skal det være fokus på å korrigere den relative energimangelen gjennom å øke energiinntaket og / eller redusere energiforbruket. Inntak av næringsstoffer og andre vitaminer bør følge de gjeldene retningslinjene for utøvere. Gjentakende vurdering av beinmineraltetthet bør skje i intervaller på 6-12 måneder, avhengig av klinisk bilde og utgangsverdier. Det anbefales også å benytte en kontrakt i forbindelse med behandlingen (Se vedlegg).

### Relativ energimangel i idrett (RED-S); trinnvis risikovurdering i forhold til det å gjenoppta trening og konkurranse

Før det gis klarsignal for å gjenoppta trening og konkurranse etter en periode med behandling anbefales en ny helse undersøkelse hvor også idrettsespesifikke forhold knyttet til den gjeldene utøver blir tatt i betraktning:

| TRINN                                                 | MODIFISERENDE RISIKO FAKTORER           | KRITERIER                                                                                                                                                                                            | RED-S SPESIFIKKE KRITERIER                                                                                                                                                                                                                                                                                                                                                                                                                                                                             |
|-------------------------------------------------------|-----------------------------------------|------------------------------------------------------------------------------------------------------------------------------------------------------------------------------------------------------|--------------------------------------------------------------------------------------------------------------------------------------------------------------------------------------------------------------------------------------------------------------------------------------------------------------------------------------------------------------------------------------------------------------------------------------------------------------------------------------------------------|
| <b>Trinn 1</b><br>Evaluering av helsestatus           | MEDISINSKE FAKTORER                     | <ul style="list-style-type: none"> <li>- Pasient demografi</li> <li>- Symptomer</li> <li>- Medisinsk historie</li> <li>- Tegn</li> <li>- Diagnostiske tester</li> <li>- Psykologisk helse</li> </ul> | <ul style="list-style-type: none"> <li>- Alder, kjønn</li> <li>- Se kolonne for «Gult lys» i RED-S risikovurderingsmodell</li> <li>- Gjentakende slanking, menstruasjonssyklus, beinmineraltetthet</li> <li>- Vekttap/endringer, generell svekkelse</li> <li>- Hormoner, elektrolytter, EKG, DXA</li> <li>- Depresjon, angst, forstyrret spiseatferd/spiseforstyrrelser</li> <li>- Abnormal hormonell og metabolsk funksjon</li> <li>- Rytmeforstyrrelser i hjertet</li> <li>- Stress brudd</li> </ul> |
| <b>TRINN 2</b><br>Evaluering av risiko ved deltagelse | MODIFISERENDE RISIKOFAKTORER VED IDRETT | <ul style="list-style-type: none"> <li>- Type idrett</li> <li>- Spesifikke oppgaver i idretten/posisjon på laget</li> <li>- Konkurransenivå</li> </ul>                                               | <ul style="list-style-type: none"> <li>- Vektsensitive idretter, fokus på kroppsform og tynnhet</li> <li>- Individuell vs. lagidrett</li> <li>- Elite vs. Mosjonist</li> </ul>                                                                                                                                                                                                                                                                                                                         |
| <b>TRINN 3</b><br>Medvirkende forhold                 | MODIFISERENDE FORHOLD                   | <ul style="list-style-type: none"> <li>- Timing og sesong</li> <li>- Ytre press</li> <li>- Interessekonflikt</li> <li>- Frykt for søksmål</li> </ul>                                                 | <ul style="list-style-type: none"> <li>- Utenfor sesong, reise, miljømessige faktorer</li> <li>- Mentalt «klar» for å konkurrere</li> <li>- Trener, eier av lag, utøverens familie, sponsorstøtte</li> </ul>                                                                                                                                                                                                                                                                                           |

### Reklassifisering av utøveren etter en trinnvis risikovurdering

I etterkant av en periode med oppfølging/behandling vil en trinnvis risikovurdering av den gjeldene utøver i forhold til det å gjenoppta trening og konkurranse igjen kunne klassifisere/re-klassifisere utøveren til «Høy risiko – rødt lys», «Moderat risiko – gult lys» eller «Lav risiko – grønt lys» kategoriene. RED-S modell for risikovurdering er tilpasset for å hjelpe klinikere til å ta en avgjørelse når det gjelder spørsmålet om utøveren er klar for å gjenoppta trening og konkurranse.

RED-S modell for gjenopptagelse av trening og konkurranse viser hvilken aktivitet som er anbefalt for hver risiko kategori.

| HØY RISIKO<br>RØDT LYS                                                                                                               | MODERAT RISIKO<br>GULT LYS                                                                                                                                                  | LAV RISIKO<br>GRØNT LYS                                              |
|--------------------------------------------------------------------------------------------------------------------------------------|-----------------------------------------------------------------------------------------------------------------------------------------------------------------------------|----------------------------------------------------------------------|
| <ul style="list-style-type: none"> <li>- Ingen konkurranse</li> <li>- Ingen trening</li> <li>- Bruk av skriftlig kontrakt</li> </ul> | <ul style="list-style-type: none"> <li>- Kan trene så lenge han/hun følger behandlingsplanen</li> <li>- Kan konkurrere så lenge han/hun følger behandlingsplanen</li> </ul> | <ul style="list-style-type: none"> <li>- Kan delta på alt</li> </ul> |

# VEDLEGG

## Behandlings kontrakt for Relativ energimangel i idrett (RED-S)

RED-S Behandlings kontrakt for \_\_\_\_\_

### Tverrfaglig Team:

- (Lege) \_\_\_\_\_
- (Psykolog/Psykiater) \_\_\_\_\_
- (Treningsfysiolog) \_\_\_\_\_
- (Ernæringsfysiolog) \_\_\_\_\_
- (Andre) \_\_\_\_\_

### Krav:

- Møte med psykiater med intervaller anbefalt av behandlingsteamet
- Møte med ernæringsfysiolog med intervaller anbefalt av behandlingsteamet
- Møte med lege med intervaller anbefalt av behandlingsteamet
- Følge daglig mat plan utviklet av behandlingsteamet
- Følge den tilpassede treningsplanen utviklet av behandlingsteamet
- Dersom undervektig, forventet vektøkning på \_\_\_\_\_ kg per uke/vektstabil innen \_\_\_\_\_ uker
- Dersom undervektig, et krav på oppnåelse av minimum akseptabel kroppsvekt/ fettprosent på \_\_\_\_\_ kg/% innen \_\_\_\_\_
- Regelmessig innveining med følgende tidsintervall på \_\_\_\_\_ uke (er)
- Etter denne datoen, \_\_\_\_\_ (dag/måned/år), må vekt og fett % opprettholdes på eller over minimum akseptert kroppsvekt/fett masse på \_\_\_\_\_ (kg/%)
- Annet \_\_\_\_\_

Dersom **ALLE** kravene oppfylles samtidig med at spiseatferden (og andre alvorlige tilstander) er normalisert, vil team-legen ta en avgjørelse vedrørende klarering for konkurransedeltakelse.

Jeg, \_\_\_\_\_, har lest denne kontrakten og alle mine spørsmål ble besvart.

|                   |                    |      |
|-------------------|--------------------|------|
| Utøvers navn      | Utøvers signatur   | Dato |
| Navn på team lege | Signatur team lege | Dato |

## Referanser

Mountjoy M, Sundgot-Borgen J, Burke L, et al. IOC Consensus Statement. Beyond the Triad – RED-S in sport. Br J Sports Med. 2014; 48: 491-7.

## Medvirkende forfattere

|                                    |                                                                                                                                                              |
|------------------------------------|--------------------------------------------------------------------------------------------------------------------------------------------------------------|
| <b>Margo Mountjoy (CAN)</b>        | IOC Medical Commission Games Group<br>McMaster University Medical School                                                                                     |
| <b>Jorunn Sundgot-Borgen (NOR)</b> | Department of Sports Medicine<br>The Norwegian School of Sport Sciences                                                                                      |
| <b>Louise Burke (AUS)</b>          | Sports Nutrition, Australian Institute of Sport                                                                                                              |
| <b>Susan Carter (USA)</b>          | University of Northern Colorado<br>University of Colorado Medical School                                                                                     |
| <b>Naama Constantini (ISR)</b>     | Orthopedic Department, Hadassah-Hebrew University Medical Center                                                                                             |
| <b>Constance Lebrun (CAN)</b>      | Department of Family Medicine,<br>Faculty of Medicine & Dentistry, and Glen Sather Sports Medicine Clinic, University of Alberta                             |
| <b>Nanna Meyer (USA)</b>           | University of Colorado, Health Sciences Department                                                                                                           |
| <b>Roberta Sherman (USA)</b>       | The Victory Program at McCallum Place                                                                                                                        |
| <b>Kathrin Steffen (NOR)</b>       | Department of Sports Medicine,<br>The Norwegian School of Sport Sciences                                                                                     |
| <b>Richard Budgett (SUI)</b>       | IOC Medical and Scientific Department                                                                                                                        |
| <b>Arne Ljungqvist (SWE)</b>       | IOC Medical Commission                                                                                                                                       |
| <b>Kathryn Ackerman (USA)</b>      | Divisions of Sports Medicine and Endocrinology,<br>Boston Children's Hospital, Neuroendocrine Unit<br>Massachusetts General Hospital, Harvard Medical School |

### Til norsk og oversatt av

Jorunn Sundgot-Borgen (NOR) Department of Sports Medicine, The Norwegian School of Sport Sciences
